# Supplementary material for: Physical and chemical dual-confinement of polysulfides within hierarchically meso-microporous nitrogen-doped carbon nanocages for advanced Li–S batteries
Source: Royal Society of Chemistry journal article supplement (doi:10.1039/c7ra07918d), 2017-01-01
Supplement: c7ra07918d1.pdf [file c7ra07918d1.pdf]

## Supporting Information

### Physical and Chemical Dual-Confinement of Polysulfides within Hierarchically Meso-microporous Nitrogen-Doped Carbon Nanocages for Advanced Li-S Batteries

Pan Wu,<sup>a</sup> Ming-Hui Sun,<sup>a</sup> Yong Yu,<sup>a</sup> Zhao Peng,<sup>a</sup> Shimeles T. Bulbula,<sup>a</sup> Yu Li,<sup>a</sup> Li-Hua Chen\*<sup>a</sup> and Bao-Lian Su\*<sup>a,b,c</sup>

<sup>a</sup> *Laboratory of Living Materials, the State Key Laboratory of Advanced Technology for Materials Synthesis and Processing, Wuhan University of Technology, 122 Luoshi Road, 430070, Wuhan, China. E-mail: [chenlihua@whut.edu.cn](mailto:chenlihua@whut.edu.cn); [baoliansu@whut.edu.cn](mailto:baoliansu@whut.edu.cn)*

<sup>b</sup> *Laboratory of Inorganic Materials Chemistry (CMI), University of Namur, 61 rue de Bruxelles, B-5000 Namur, Belgium. E-mail: [bao-lian.su@unamur.be](mailto:bao-lian.su@unamur.be)*

<sup>c</sup> *Department of Chemistry and Clare Hall, University of Cambridge, Cambridge, CB2 1EW, UK.*

E-mail for corresponding author:: [chenlihua@whut.edu.cn](mailto:chenlihua@whut.edu.cn); [bao-lian.su@unamur.be](mailto:bao-lian.su@unamur.be)

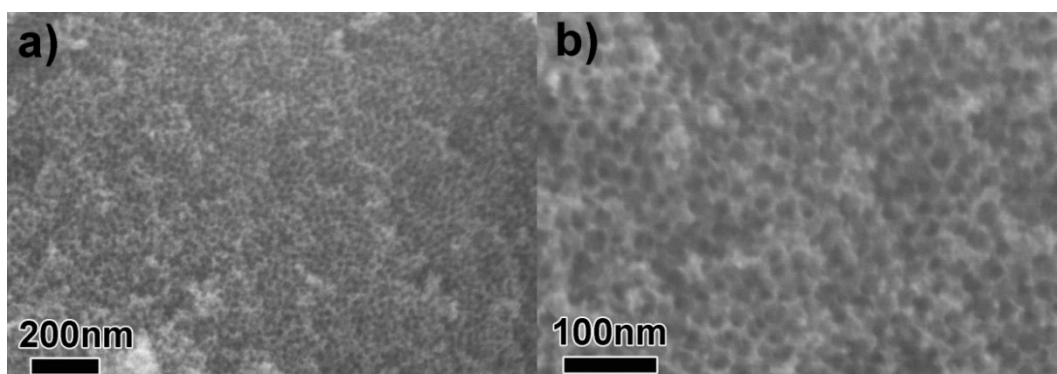

Fig. S1 SEM images of N-MMC.

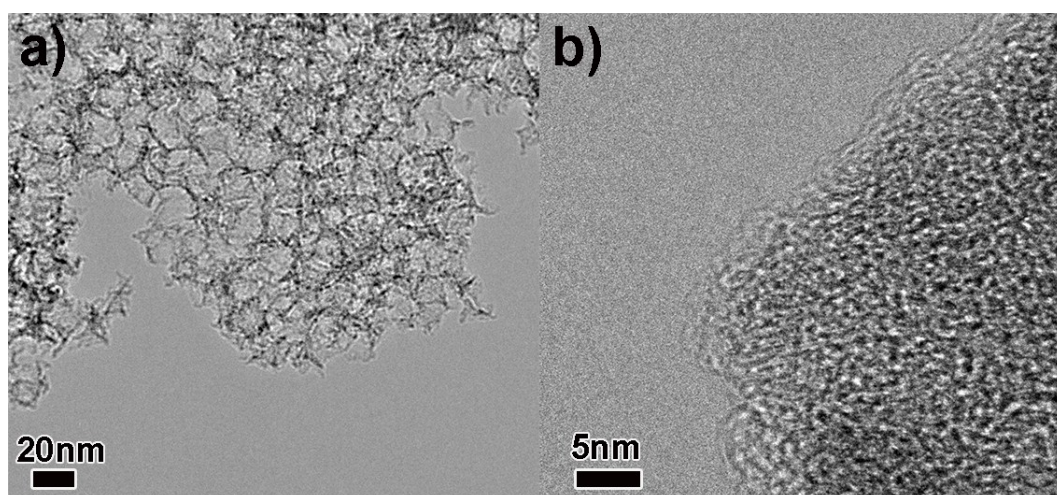

Fig. S2 TEM images of (a) N-MesoC, (b) N-MicroC.

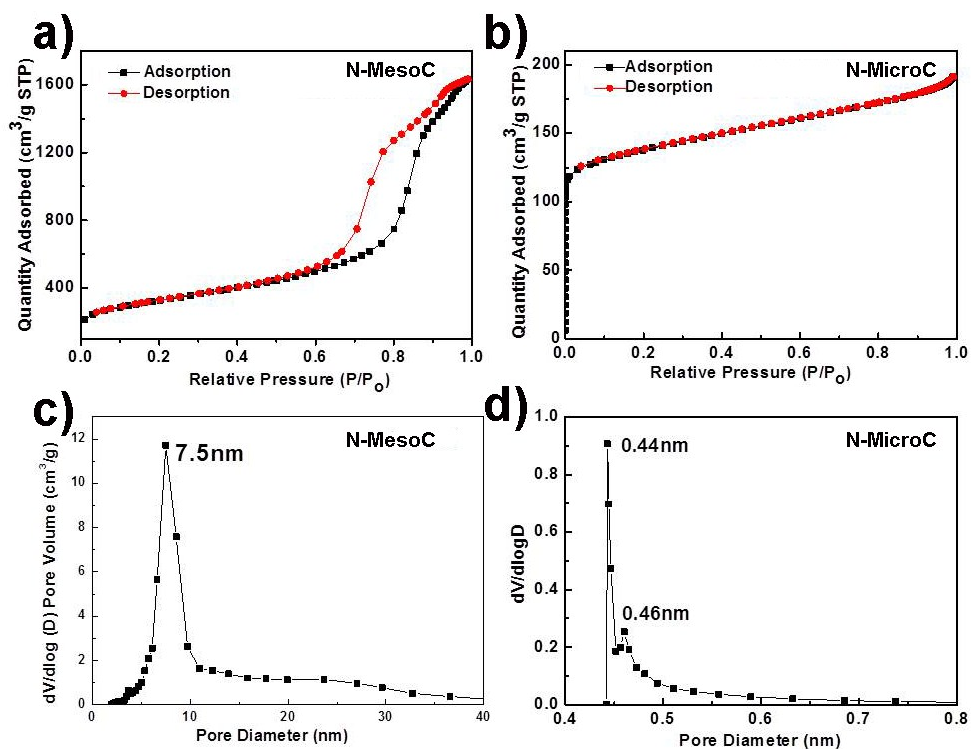

**Fig. S3** (a)  $\text{N}_2$  adsorption-desorption isotherm plot of N-MesoC. (b)  $\text{N}_2$  adsorption-desorption isotherm plot of N-MicroC. (c) BJH pore size distribution N-MesoC. (d) t-plot pore size distribution of N-MicroC.

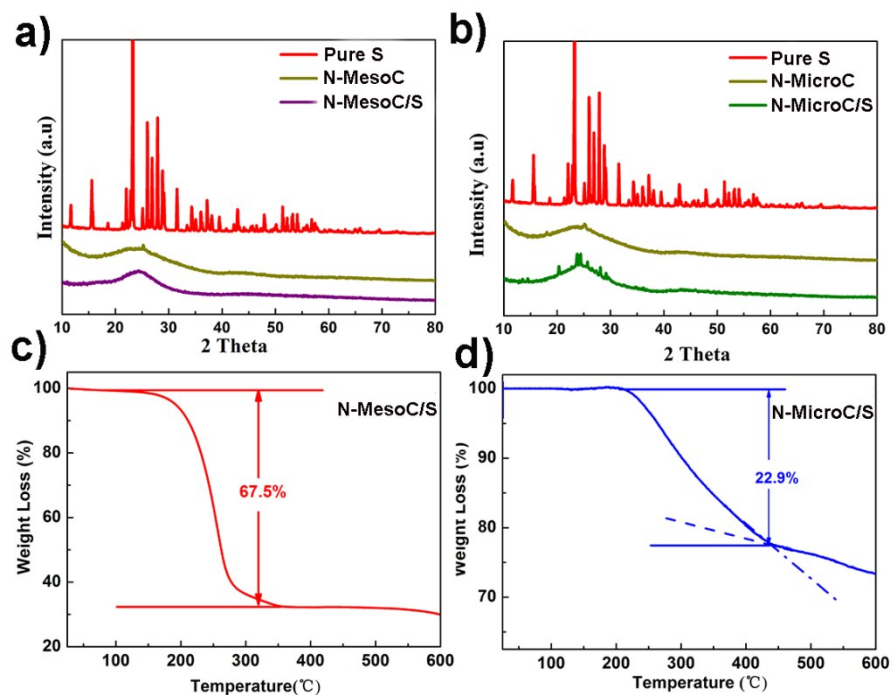

**Fig. S4** (a) XRD patterns of N-MesoC/S. (b) XRD patterns of N-MicroC/S. (c) TG curves of N-MesoC/S. (d) TG curves of N-MicroC/S.

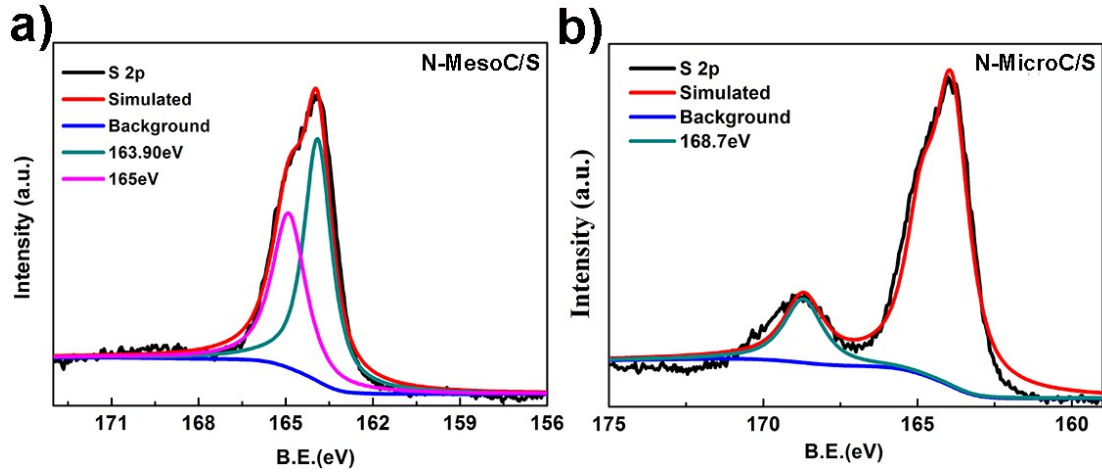

Fig. S5 XPS survey (a) S 2p spectra of N-MesoC/S, (b) S 2p spectra of N-MicroC/S.

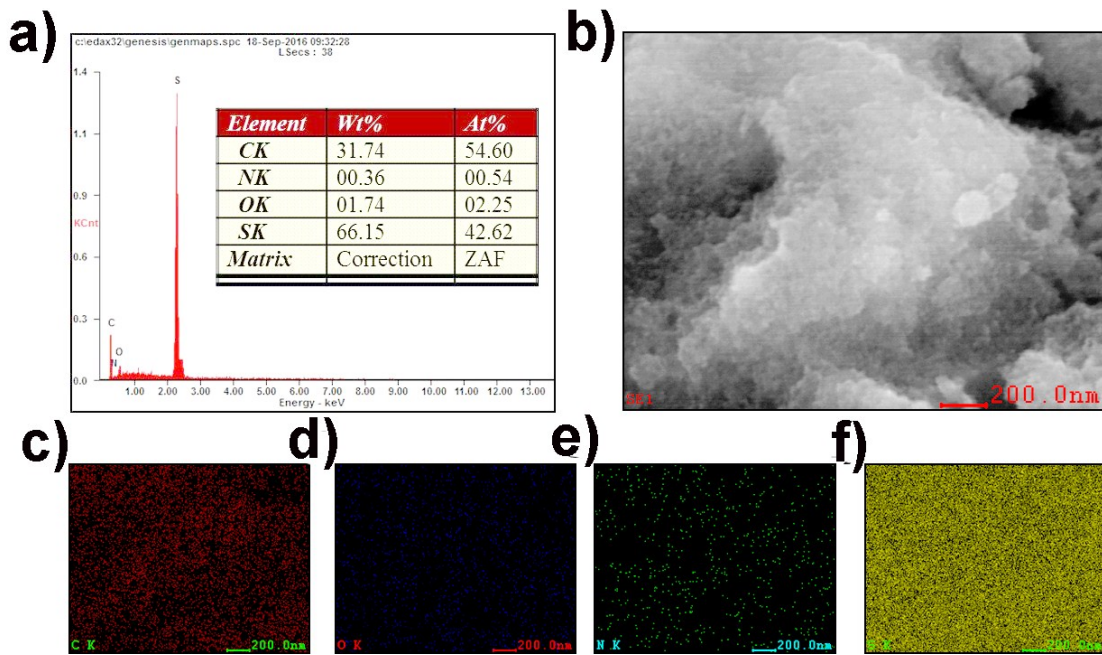

Fig. S6 (a-b) EDX patterns of N-MMC/S and corresponding elemental mapping across the selected area, (c-f) of N-MMC/S.

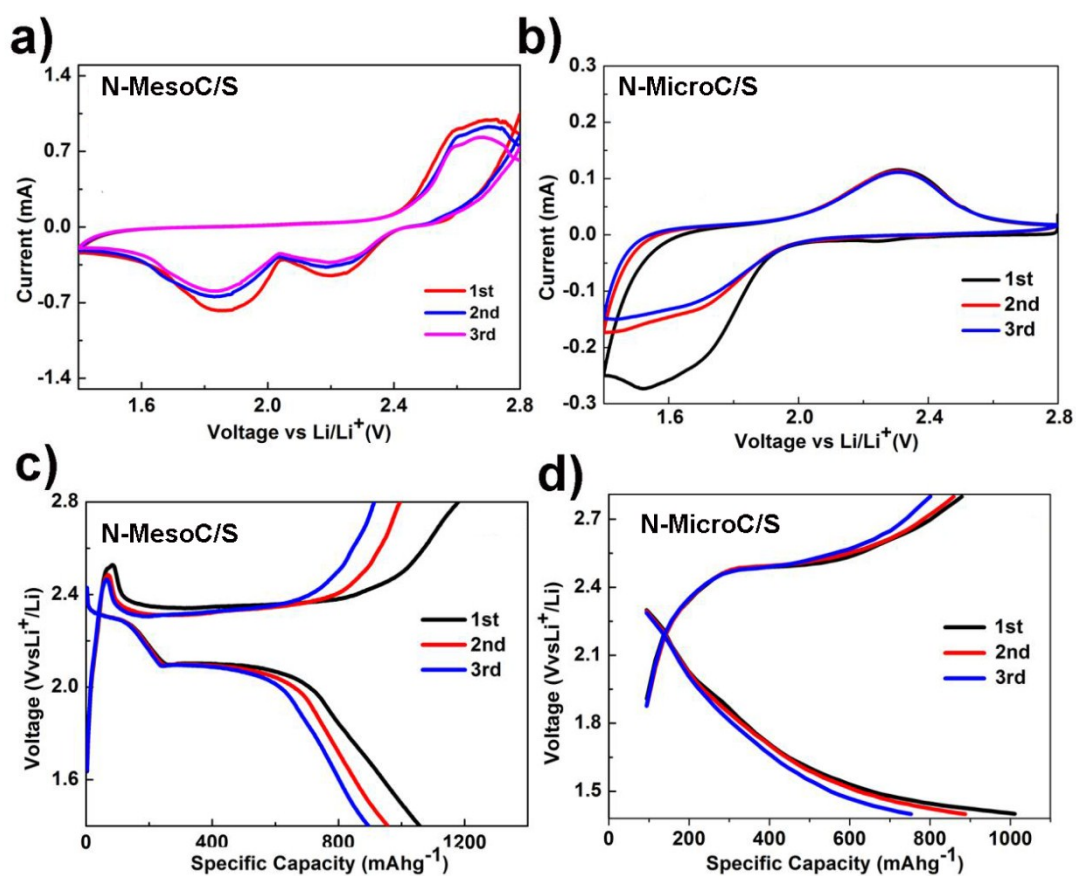

Fig. S7 (a) CV curves of (a) N-MesoC/S, (b) N-MicroC/S electrode at a sweep rate of 0.2 mV/s in the potential range from 2.80V to 1.40 V vs Li/Li+. (c) The discharge/charge profiles of (c) N-MesoC/S, (d)

N-MicroC/S electrode cycled at 0.2C current density.

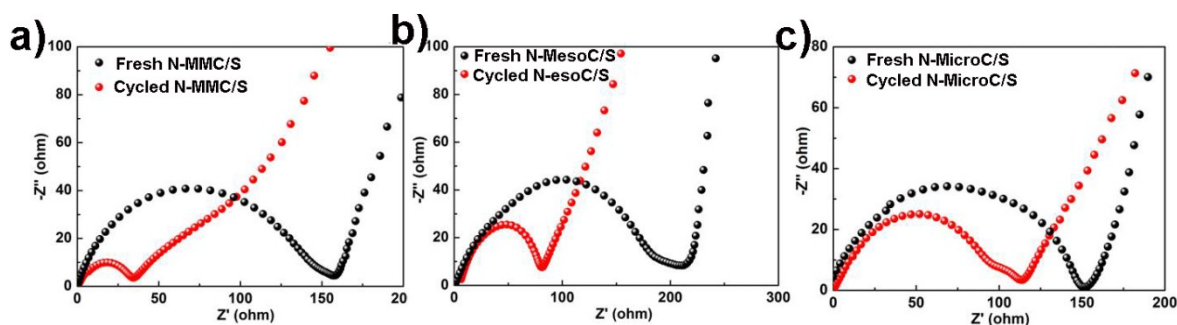

Fig. S8 EIS spectra of (a) N-MMC/S, (b) N-MesoC/S, (c) N-MicroC/S electrodes before and after

cycles from 1 mHz to 100 mHz at room temperature.
